# Supplementary material
Source: PubMed Central journal article supplement (PMC5079766)
Supplement: NIHMS796302-supplement-Supplemental.pdf [file NIHMS796302-supplement-Supplemental.pdf]

**Dysregulation of Innate and Adaptive Serum Mediators Precedes Systemic Lupus Erythematosus Classification and Improves Prognostic Accuracy of Autoantibodies**

**by Lu, Munroe et al.**

**Contents**

**Supplemental Table 1.** Study cohort demographics

**Supplemental Table 2.** Wilcoxon rank-sum test of soluble mediators in each time period

**Supplemental Figure 1.** Separation of samples into four time periods relative to SLE classification

**Supplemental Figure 2.** Overview of Random Forest modeling

**Supplemental Figure 3.** Number of SLE-associated autoantibody specificities increases in cases as they approach SLE classification, but not in healthy controls

**Supplemental Table 1.** Study cohort demographics

|                                                   | <b>Case (%)<br/>n=84</b> | <b>Control (%)<br/>n=86</b> | <b>p-<br/>value</b> |
|---------------------------------------------------|--------------------------|-----------------------------|---------------------|
| <b>Gender</b>                                     |                          |                             |                     |
| Male                                              | 32 (38.1%)               | 33 (38.4%)                  | 0.9 <sup>a</sup>    |
| Female                                            | 52 (61.9%)               | 53 (61.6%)                  | -                   |
| <b>Ethnicity</b>                                  |                          |                             |                     |
| European American                                 | 20 (23.8%)               | 20 (23.2%)                  | 1.0 <sup>a</sup>    |
| African American                                  | 50 (59.5%)               | 51 (59.3%)                  | -                   |
| Hispanic                                          | 10 (11.9%)               | 11 (12.8%)                  | -                   |
| Other                                             | 4 (4.8%)                 | 4 (4.7%)                    | -                   |
| <b>Age at classification<sup>c</sup><br/>(SD)</b> | 30.4 (6.3)               | 30.5 (6.3)                  | 0.9 <sup>b</sup>    |

<sup>a</sup>Chi-square test; <sup>b</sup>Unpaired *t*-test; <sup>c</sup>In cases; controls were matched by gender, race, age ( $\pm$  5 years), and time of sample procurement

**Supplemental Table 2.** Wilcoxon rank-sum test of soluble mediators in each time period. Mediators above the red line were significantly different between cases and controls.

| <b>&gt;3.5 years before classification</b> |                                    |                                       |                |                |
|--------------------------------------------|------------------------------------|---------------------------------------|----------------|----------------|
| <b>Soluble mediator, (Normalized FI)</b>   | <b>Case (n = 61), Median (IQR)</b> | <b>Control (n = 56), Median (IQR)</b> | <b>p-value</b> | <b>q-value</b> |
| IL-5                                       | 1.38 (1.24 - 1.62)                 | 0.86 (0.64 - 1.26)                    | 1.36E-07       | 3.60E-06       |
| IL-6                                       | 1.69 (1.4 - 2.15)                  | 1.14 (0.88 - 1.44)                    | 5.16E-07       | 6.83E-06       |
| IL-4                                       | 1.6 (1.31 - 2)                     | 1.25 (1 - 1.61)                       | 1.17E-03       | 1.00E-02       |
| MIG                                        | 0.33 (0.16 - 0.6)                  | 0.54 (0.34 - 0.77)                    | 2.41E-03       | 1.30E-02       |
| IL12p70                                    | 1.5 (1.33 - 1.83)                  | 1.24 (1 - 1.6)                        | 2.15E-03       | 1.30E-02       |
| IP-10                                      | 2.83 (1.89 - 4.67)                 | 2.08 (1.45 - 3.2)                     | 5.55E-03       | 2.30E-02       |
| TGF-β                                      | 1.84 (1.47 - 2.54)                 | 2.69 (1.58 - 4.93)                    | 6.14E-03       | 2.30E-02       |
| IFN-γ                                      | 2.56 (2.2 - 2.98)                  | 2.2 (1.74 - 2.75)                     | 1.05E-02       | 3.50E-02       |
| IL-1α                                      | 0.85 (0.58 - 1.31)                 | 1.12 (0.77 - 1.42)                    | 2.60E-02       | 7.60E-02       |
| IL-17A                                     | 1.87 (1.32 - 2.29)                 | 1.51 (1.25 - 1.9)                     | 4.06E-02       | 1.07E-01       |
| IL-13                                      | 1.32 (1.02 - 1.86)                 | 1.21 (0.91 - 1.63)                    | 4.70E-02       | 1.13E-01       |
| IL-1β                                      | 1.57 (1.33 - 2.07)                 | 1.43 (1 - 1.97)                       | 8.55E-02       | 1.89E-01       |
| sFasL                                      | 5.21 (1.97 - 7.1)                  | 3.88 (2.45 - 5.92)                    | 2.45E-01       | 4.99E-01       |
| IL-1RA                                     | 1.7 (1.2 - 2.84)                   | 1.5 (1.02 - 2.52)                     | 3.01E-01       | 5.66E-01       |
| IL-23p19                                   | 1.65 (1.27 - 2.32)                 | 1.52 (1.14 - 2.1)                     | 3.21E-01       | 5.66E-01       |
| TNFR II                                    | 1.01 (0.92 - 1.21)                 | 1 (0.9 - 1.11)                        | 3.53E-01       | 5.84E-01       |
| SCF                                        | 0.51 (0.31 - 0.8)                  | 0.54 (0.33 - 0.8)                     | 4.55E-01       | 6.44E-01       |
| IL-21                                      | 0.69 (0.51 - 1.08)                 | 0.67 (0.43 - 1.01)                    | 4.62E-01       | 6.44E-01       |
| APRIL*                                     | 5524 (0 - 18877.33)                | 4869.57 (0 - 14735.83)                | 4.39E-01       | 6.44E-01       |
| MCP-3                                      | 1.33 (1.06 - 1.75)                 | 1.3 (1.12 - 1.57)                     | 5.46E-01       | 7.23E-01       |
| Resistin                                   | 1.24 (0.81 - 1.87)                 | 1.32 (0.75 - 2.07)                    | 6.41E-01       | 8.08E-01       |
| PAI-1                                      | 1.26 (1.2 - 1.32)                  | 1.26 (1.2 - 1.33)                     | 7.08E-01       | 8.22E-01       |
| sCD40L                                     | 0.04 (0.03 - 0.05)                 | 0.04 (0.03 - 0.06)                    | 7.14E-01       | 8.22E-01       |
| IL-8                                       | 4.53 (2.93 - 19.41)                | 4.28 (2.97 - 15.24)                   | 8.10E-01       | 8.76E-01       |
| MIP-1α                                     | 2.41 (1.51 - 4.81)                 | 2.13 (1.49 - 3.95)                    | 9.16E-01       | 8.76E-01       |
| TNFR I                                     | 1.05 (0.94 - 1.14)                 | 1.03 (0.91 - 1.17)                    | 9.16E-01       | 8.76E-01       |
| IL-2                                       | 1.4 (1.14 - 2)                     | 1.33 (1.17 - 1.81)                    | 8.80E-01       | 8.76E-01       |
| BLyS*                                      | 1049.55 (883.31 - 1319.46)         | 1042.96 (905.99 - 1241.23)            | 9.27E-01       | 8.76E-01       |

\*Units pg/ml

**Supplemental Table 2, cont.**

| <b>3.5 to 0.9 years before classification</b> |                                    |                                       |                |                |
|-----------------------------------------------|------------------------------------|---------------------------------------|----------------|----------------|
| <b>Soluble mediator, (Normalized FI)</b>      | <b>Case (n = 61), Median (IQR)</b> | <b>Control (n = 35), Median (IQR)</b> | <b>p-value</b> | <b>q-value</b> |
| IL-5                                          | 1.5 (1.25 - 1.88)                  | 0.96 (0.74 - 1.09)                    | 7.78E-09       | 1.43E-07       |
| IL-6                                          | 2 (1.38 - 2.6)                     | 1.12 (0.92 - 1.42)                    | 2.68E-06       | 2.46E-05       |
| IL-4                                          | 1.67 (1.17 - 2.1)                  | 1.17 (1 - 1.44)                       | 3.30E-04       | 1.50E-03       |
| IL-12p70                                      | 1.5 (1.29 - 2.14)                  | 1.22 (0.93 - 1.5)                     | 2.56E-04       | 1.50E-03       |
| IP-10                                         | 5.67 (2.67 - 10.33)                | 2.5 (1.74 - 4.31)                     | 4.82E-04       | 1.80E-03       |
| IL-17A                                        | 2.05 (1.68 - 2.5)                  | 1.58 (1.18 - 2.01)                    | 1.78E-03       | 5.40E-03       |
| IL-13                                         | 1.25 (1.11 - 2.2)                  | 1.11 (0.84 - 1.32)                    | 3.76E-03       | 9.90E-03       |
| IL-21                                         | 0.88 (0.55 - 1.85)                 | 0.54 (0.47 - 0.88)                    | 6.28E-03       | 1.44E-02       |
| MIP-1 $\alpha$                                | 4 (2.23 - 8.47)                    | 2.2 (1.26 - 4.02)                     | 9.97E-03       | 2.03E-02       |
| TGF- $\beta$                                  | 1.9 (1.41 - 2.62)                  | 2.51 (1.78 - 3.79)                    | 2.60E-02       | 4.67E-02       |
| MCP-3                                         | 1.44 (1.14 - 1.75)                 | 1.22 (0.96 - 1.48)                    | 2.80E-02       | 4.67E-02       |
| IL-2                                          | 1.5 (1.2 - 2.5)                    | 1.25 (1 - 1.5)                        | 3.44E-02       | 5.26E-02       |
| IL-1RA                                        | 1.82 (1.38 - 4.14)                 | 1.61 (0.89 - 2.33)                    | 4.41E-02       | 6.22E-02       |
| IL-23                                         | 1.67 (1.23 - 3)                    | 1.35 (1.06 - 1.98)                    | 5.75E-02       | 7.54E-02       |
| IL-1 $\beta$                                  | 1.83 (1.27 - 3)                    | 1.58 (1.12 - 2.08)                    | 8.33E-02       | 9.55E-02       |
| IFN- $\gamma$                                 | 2.7 (2.11 - 3.38)                  | 2.43 (1.72 - 3.03)                    | 8.00E-02       | 9.55E-02       |
| APRIL*                                        | 7289.3 (2180.54 - 18599.27)        | 4038.53 (0 - 10773.89)                | 9.00E-02       | 9.71E-02       |
| TNFR I                                        | 0.99 (0.88 - 1.17)                 | 1.06 (0.99 - 1.22)                    | 1.28E-01       | 1.31E-01       |
| Resistin                                      | 1.25 (0.84 - 1.79)                 | 1.57 (0.9 - 2.14)                     | 2.01E-01       | 2.94E-01       |
| SCF                                           | 0.57 (0.39 - 0.96)                 | 0.72 (0.51 - 0.99)                    | 2.60E-01       | 2.39E-01       |
| sFasL                                         | 6.08 (3.12 - 9.13)                 | 5.15 (3.08 - 7.39)                    | 3.34E-01       | 2.92E-01       |
| MIG                                           | 0.42 (0.2 - 1.08)                  | 0.51 (0.38 - 0.73)                    | 4.65E-01       | 3.88E-01       |
| sCD40L                                        | 0.04 (0.03 - 0.06)                 | 0.03 (0.03 - 0.07)                    | 5.15E-01       | 4.11E-01       |
| IL-1 $\alpha$                                 | 1 (0.66 - 1.33)                    | 1.08 (0.77 - 1.36)                    | 6.64E-01       | 5.08E-01       |
| IL-8                                          | 7.07 (3.05 - 55.23)                | 9.08 (2.92 - 31.57)                   | 7.81E-01       | 5.73E-01       |
| PAI-1                                         | 1.27 (1.23 - 1.32)                 | 1.28 (1.2 - 1.31)                     | 8.61E-01       | 6.08E-01       |
| TNFR II                                       | 1.01 (0.87 - 1.19)                 | 1.01 (0.91 - 1.12)                    | 9.09E-01       | 6.17E-01       |
| BLyS*                                         | 1095.87 (888.12 - 1448.08)         | 1127.84 (897.78 - 1271.26)            | 9.42E-01       | 6.17E-01       |

\*Units pg/ml

**Supplemental Table 2, cont.**

| <b>0.9 years before to 0.1 years after classification</b> |                                    |                                       |                |                |
|-----------------------------------------------------------|------------------------------------|---------------------------------------|----------------|----------------|
| <b>Soluble mediator, (Normalized FI)</b>                  | <b>Case (n = 63), Median (IQR)</b> | <b>Control (n = 23), Median (IQR)</b> | <b>p-value</b> | <b>q-value</b> |
| IL-5                                                      | 1.75 (1.31 - 2.08)                 | 1 (0.61 - 1.14)                       | 2.32E-08       | 1.37E-07       |
| IL-6                                                      | 1.86 (1.5 - 3.29)                  | 1.21 (0.81 - 1.43)                    | 1.07E-06       | 3.15E-06       |
| IP-10                                                     | 18.75 (6.09 - 51.5)                | 4.08 (2.63 - 5.79)                    | 8.24E-06       | 1.62E-05       |
| TNFR II                                                   | 1.24 (1.09 - 1.42)                 | 0.97 (0.85 - 1.08)                    | 3.01E-05       | 4.43E-05       |
| TGF-β                                                     | 2.21 (1.69 - 3)                    | 3.67 (2.47 - 6.54)                    | 3.76E-04       | 3.69E-04       |
| IFN-γ                                                     | 3.43 (2.75 - 4.38)                 | 2.06 (1.81 - 2.87)                    | 3.36E-04       | 3.69E-04       |
| BLyS*                                                     | 1374.12 (1018.56 - 1788.81)        | 1014.64 (792.86 - 1225.4)             | 6.60E-04       | 5.56E-04       |
| IL-17A                                                    | 2.15 (1.75 - 2.95)                 | 1.42 (1.25 - 2.02)                    | 2.07E-03       | 1.50E-03       |
| IL-12p70                                                  | 1.75 (1.5 - 2.17)                  | 1.39 (1.07 - 1.77)                    | 5.24E-03       | 3.40E-03       |
| APRIL *                                                   | 9010.05 (3232.99 - 22773.56)       | 1615.03 (0 - 7540.67)                 | 6.05E-03       | 3.60E-03       |
| TNFR I                                                    | 1.22 (1.02 - 1.5)                  | 1.04 (0.91 - 1.14)                    | 7.85E-03       | 4.20E-03       |
| sFasL                                                     | 6.08 (3.12 - 9)                    | 3.44 (2.57 - 4.65)                    | 1.18E-02       | 5.40E-03       |
| IL-1RA                                                    | 3.37 (1.62 - 7.68)                 | 1.88 (0.96 - 3.78)                    | 1.15E-02       | 5.40E-03       |
| IL-13                                                     | 1.4 (1.11 - 2.33)                  | 1.2 (0.95 - 1.6)                      | 1.43E-02       | 6.00E-03       |
| IL-23                                                     | 2 (1.28 - 2.73)                    | 1.33 (1 - 2.1)                        | 2.34E-02       | 9.20E-03       |
| IL-4                                                      | 1.8 (1.43 - 2.4)                   | 1.5 (1.17 - 1.9)                      | 3.96E-02       | 1.37E-02       |
| IL-21                                                     | 0.99 (0.55 - 2.3)                  | 0.65 (0.4 - 1.34)                     | 3.88E-02       | 1.37E-02       |
| IL-1β                                                     | 1.82 (1.36 - 2.43)                 | 1.67 (0.9 - 1.91)                     | 6.42E-02       | 2.10E-02       |
| sCD40L                                                    | 0.04 (0.03 - 0.07)                 | 0.06 (0.04 - 0.1)                     | 8.53E-02       | 2.51E-02       |
| Resistin                                                  | 1.31 (0.83 - 1.9)                  | 1.74 (0.97 - 2.51)                    | 8.27E-02       | 2.51E-02       |
| MIP-1α                                                    | 3.34 (2.16 - 8.52)                 | 2.06 (1.38 - 4.51)                    | 1.31E-01       | 3.68E-02       |
| PAI-1                                                     | 1.24 (1.17 - 1.32)                 | 1.27 (1.24 - 1.31)                    | 1.76E-01       | 4.74 E-02      |
| MCP-3                                                     | 1.62 (1.22 - 2.12)                 | 1.5 (1.09 - 1.88)                     | 2.15E-01       | 5.51E-02       |
| SCF                                                       | 0.73 (0.45 - 1.24)                 | 0.56 (0.41 - 0.94)                    | 2.45E-01       | 6.02E-02       |
| IL-2                                                      | 1.8 (1.2 - 2.5)                    | 1.33 (1.12 - 2.62)                    | 4.31E-01       | 1.02E-01       |
| MIG                                                       | 0.82 (0.26 - 1.91)                 | 0.48 (0.38 - 1)                       | 4.55E-01       | 1.03E-01       |
| IL-8                                                      | 9.23 (4.5 - 33.83)                 | 8.93 (3.89 - 28.07)                   | 6.05E-01       | 1.32E-01       |
| IL-1α                                                     | 0.93 (0.61 - 1.56)                 | 0.92 (0.71 - 1.48)                    | 9.48E-01       | 2.00E-01       |

\*Units pg/ml

**Supplemental Table 2, cont.**

| <b>&gt;0.1 years after classification</b> |                                    |                                       |                |                |
|-------------------------------------------|------------------------------------|---------------------------------------|----------------|----------------|
| <b>Soluble mediator, (Normalized FI)</b>  | <b>Case (n = 61), Median (IQR)</b> | <b>Control (n = 56), Median (IQR)</b> | <b>p-value</b> | <b>q-value</b> |
| IL-5                                      | 1.7 (1.38 - 2.07)                  | 0.9 (0.63 - 1.22)                     | 1.51E-13       | 1.71E-12       |
| IP-10                                     | 13.83 (4.35 - 37.75)               | 3.26 (2.18 - 5.31)                    | 1.64E-07       | 4.64E-07       |
| IL-12p70                                  | 1.83 (1.5 - 2.32)                  | 1.21 (1.04 - 1.6)                     | 1.16E-07       | 4.64E-07       |
| IFN- $\gamma$                             | 3.39 (2.81 - 4.86)                 | 2.49 (2 - 2.98)                       | 1.38E-07       | 4.64E-07       |
| IL-6                                      | 2 (1.6 - 3.11)                     | 1.17 (0.99 - 1.7)                     | 5.98E-07       | 1.35E-06       |
| IL-17A                                    | 2.38 (2.04 - 2.87)                 | 1.75 (1.52 - 2)                       | 4.12E-06       | 7.77E-06       |
| IL-21                                     | 1.11 (0.64 - 2.32)                 | 0.61 (0.44 - 1.01)                    | 7.54E-05       | 1.22E-04       |
| IL-23                                     | 2.05 (1.5 - 2.81)                  | 1.5 (1.18 - 1.77)                     | 9.84E-05       | 1.39E-04       |
| IL-13                                     | 1.5 (1.25 - 2.12)                  | 1.2 (0.91 - 1.5)                      | 1.44E-04       | 1.77E-04       |
| TNFR II                                   | 1.14 (0.97 - 1.37)                 | 1.01 (0.91 - 1.11)                    | 1.56E-04       | 1.77E-04       |
| IL-2                                      | 1.63 (1.2 - 2.55)                  | 1.26 (1.08 - 1.67)                    | 5.08E-04       | 5.23E-04       |
| TNFR I                                    | 1.36 (1.06 - 1.51)                 | 1.16 (1.01 - 1.26)                    | 1.14E-03       | 1.07E-03       |
| IL-4                                      | 1.8 (1.24 - 2.73)                  | 1.4 (1.1 - 1.73)                      | 2.04E-03       | 1.78E-03       |
| TGF- $\beta$                              | 2.09 (1.54 - 3.36)                 | 3.22 (2.26 - 4.92)                    | 2.52E-03       | 2.04E-03       |
| IL-1RA                                    | 2.96 (1.84 - 7.21)                 | 1.93 (1.24 - 4.33)                    | 5.24E-03       | 3.95E-03       |
| SCF                                       | 0.84 (0.55 - 1.53)                 | 0.63 (0.48 - 0.9)                     | 2.85E-02       | 2.02E-02       |
| MIP-1 $\alpha$                            | 4.6 (2.68 - 10.32)                 | 2.78 (1.94 - 7.2)                     | 3.83E-02       | 2.55E-02       |
| APRIL*                                    | 10989.46 (4931.12 - 27846)         | 7753.06 (1705.74 - 18667.66)          | 5.21E-02       | 3.27E-02       |
| MIG                                       | 0.82 (0.28 - 2.5)                  | 0.48 (0.32 - 0.61)                    | 6.34E-02       | 3.78E-02       |
| BLyS*                                     | 1220.72 (909.07 - 2014.15)         | 1065.02 (917.26 - 1314.42)            | 8.66E-02       | 4.88E-02       |
| MCP-3                                     | 1.5 (1.33 - 2.08)                  | 1.39 (1.06 - 1.93)                    | 9.05E-02       | 4.88E-02       |
| PAI-1                                     | 1.27 (1.18 - 1.34)                 | 1.28 (1.25 - 1.33)                    | 2.57E-01       | 1.32E-01       |
| Resistin                                  | 1.49 (1.1 - 2.07)                  | 1.62 (1.12 - 2.48)                    | 3.00E-01       | 1.48E-01       |
| IL-1 $\beta$                              | 1.91 (1.45 - 3.48)                 | 1.62 (1.15 - 2.97)                    | 3.77E-01       | 1.78E-01       |
| sFasL                                     | 6.36 (3.2 - 9.5)                   | 5.13 (3.94 - 7.52)                    | 4.52E-01       | 2.05E-01       |
| IL-8                                      | 8.14 (5.08 - 67.88)                | 15.1 (4.34 - 87.74)                   | 7.92E-01       | 3.45E-01       |
| IL-1 $\alpha$                             | 0.97 (0.67 - 1.36)                 | 1 (0.74 - 1.29)                       | 8.76E-01       | 3.67E-01       |
| sCD40L                                    | 0.04 (0.03 - 0.09)                 | 0.04 (0.03 - 0.1)                     | 9.18E-01       | 3.71E-01       |

\*Units pg/ml

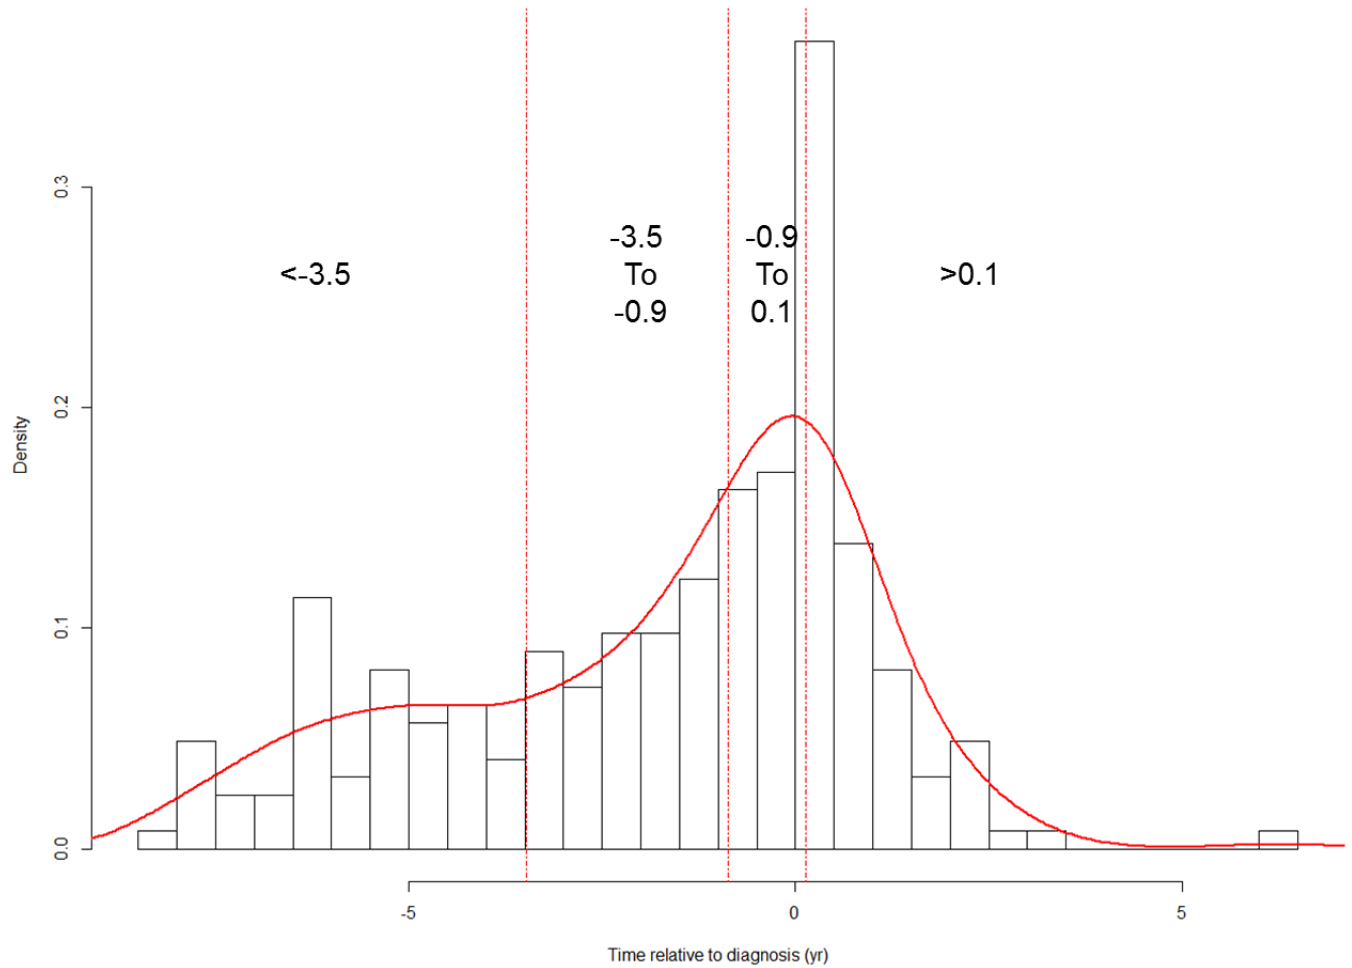

**Supplemental Figure 1. Separation of samples into four time periods relative to SLE classification.** Kernel density of sample drawn date relative to SLE classification based on cases. Quartiles were chosen to insure equal contribution of cases into each quartile.

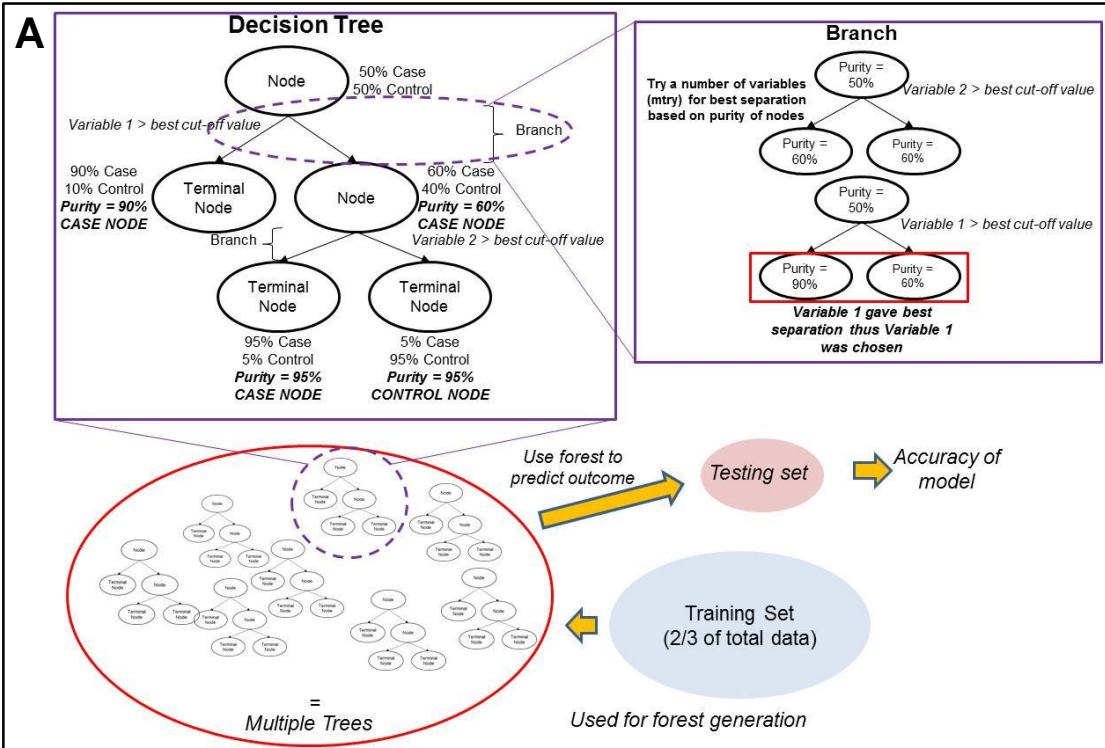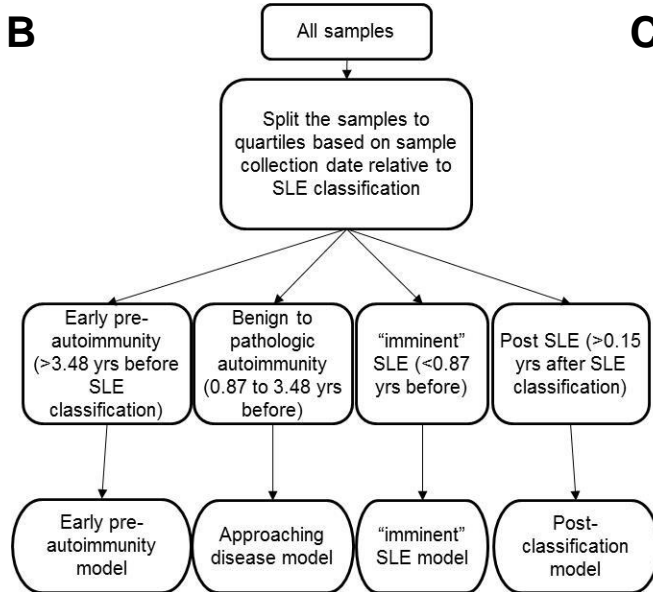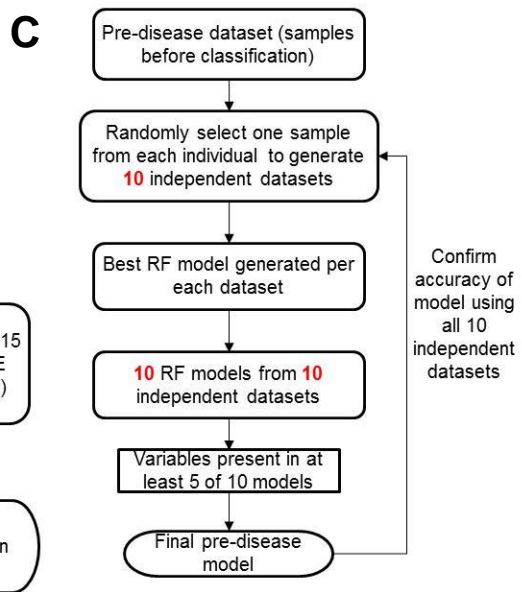

**Supplemental Figure 2. Overview of Random Forest modeling.** (A) Nomenclature used in random forest algorithm and process of generating RF models. (B-C) Flowchart of RF analysis at different time intervals (B) and for overall pre-disease modeling (C).



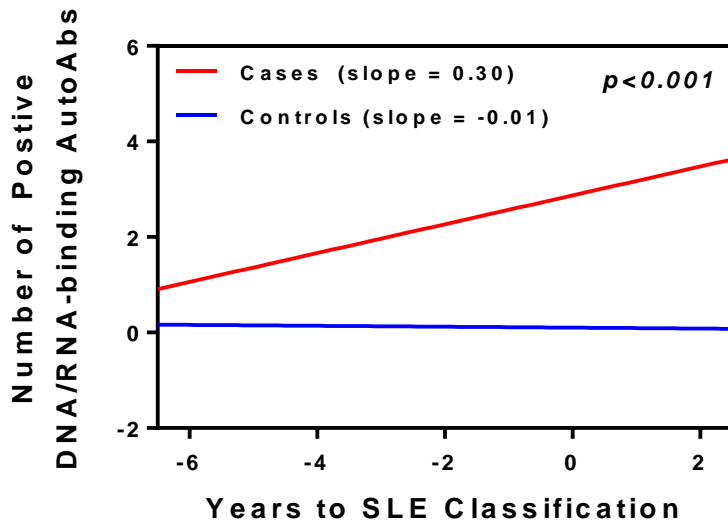

**Supplemental Figure 3. Number of SLE-associated autoantibody specificities increases in cases as they approach SLE classification, but not in healthy controls.** Number of positive DNA/RNA-binding autoantibody specificities (binding dsDNA, chromatin, Ro/SSA, La/SSB, Sm, SmRNP, and RNP) over time in patients prior to SLE classification (red), vs. race, gender, age ( $\pm 5$  years) and time of sample procurement-matched healthy controls (blue). P-value for the fixed effect of disease status are show
